# Supplementary material for: Transcriptome Analysis and Identification of Genes Associated with Starch Metabolism in Castanea henryi Seed (Fagaceae)
Source: PubMed Central journal article supplement (PMC7073145; doi:10.3390/ijms21041431), 2020-02-20
Supplement: ijms-21-01431-s001.pdf [file ijms-21-01431-s001.pdf]

# Supplementary Information

## Supplementary Figures

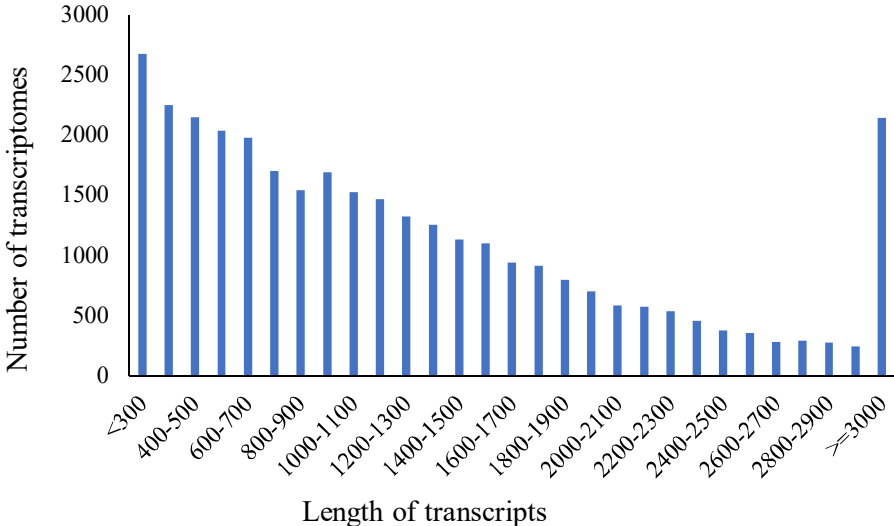

Supplementary Figure. S1. Distribution of transcripts lengths.

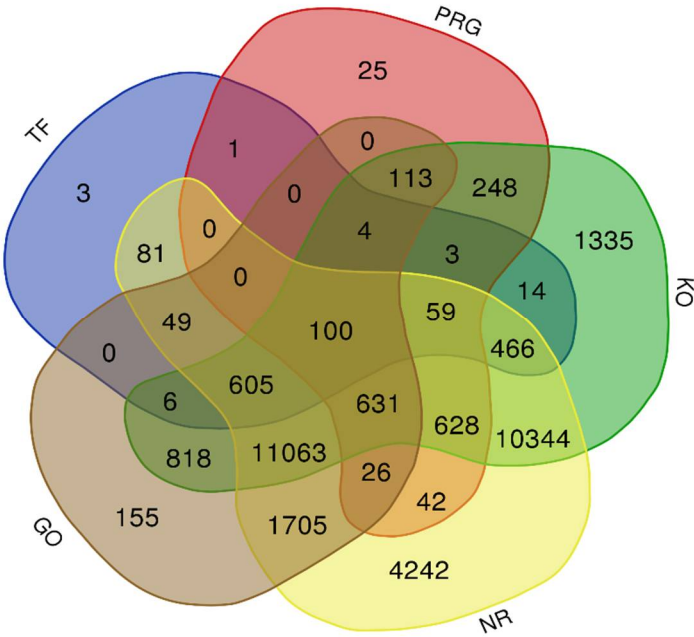

Supplementary Figure. S2. Venn diagram of the genes annotation results.

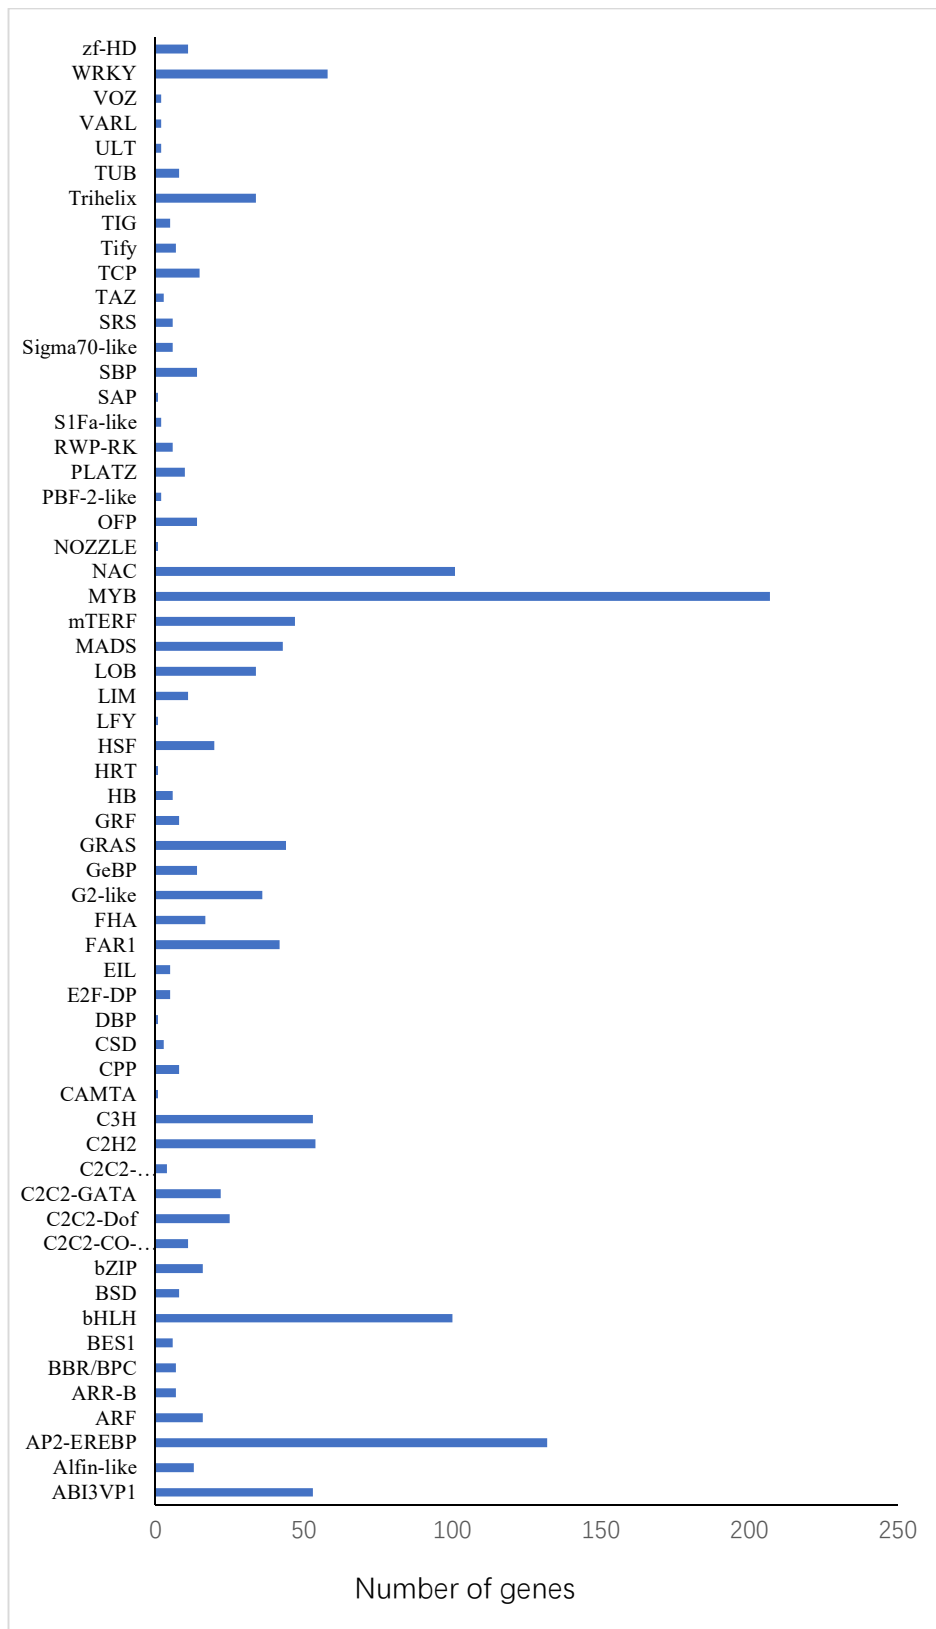

Supplementary Figure. S3. TF annotation of genes.

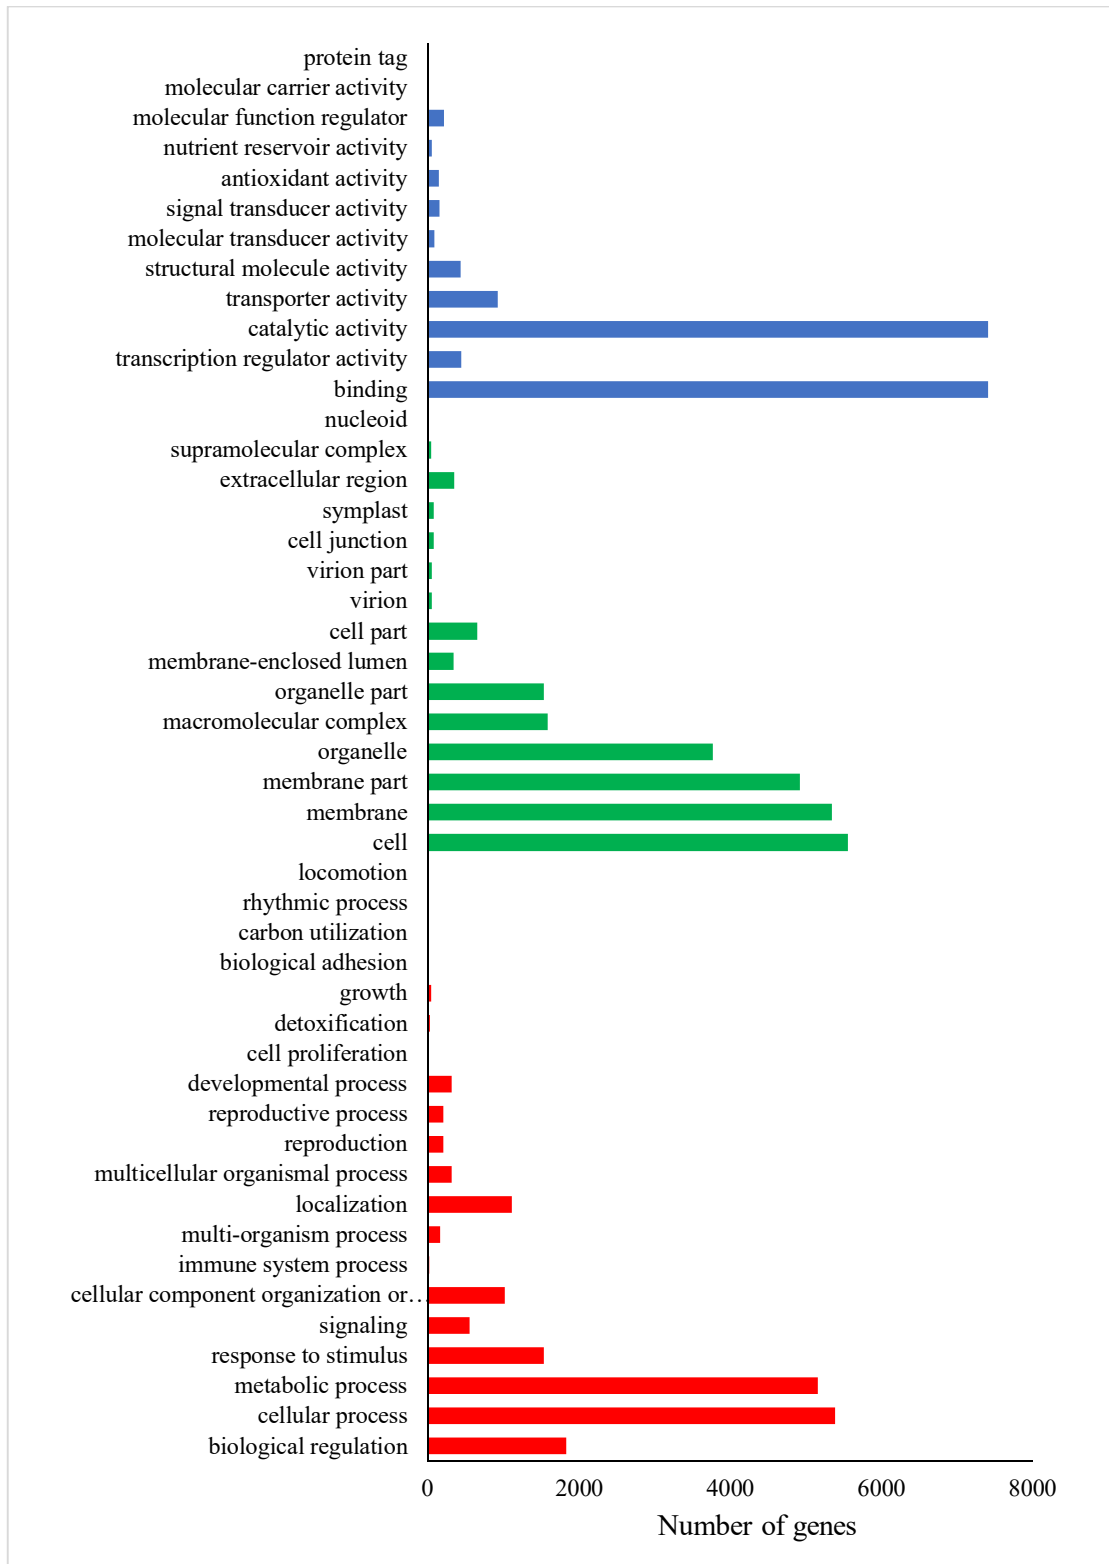

Supplementary Figure. S4. GO annotation of genes.

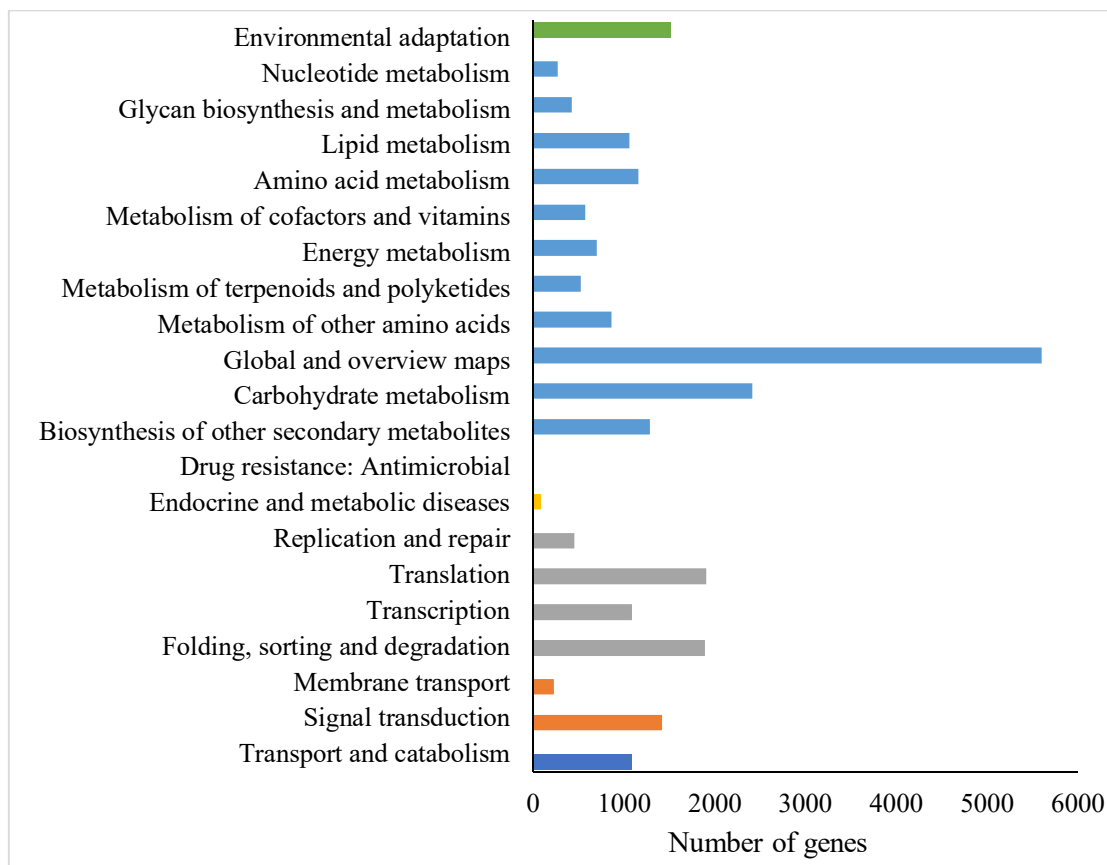

Supplementary Figure. S5. KEGG annotation of genes.

### Supplementary Tables

Supplementary Table S1. RNA sequencing results and reference genome mapping statistics.

| Sample | Raw Reads (M) | Clean Reads (M) | Reads Q20(%) | Total Mapping(%) | Uniquely Mapping(%) |
|--------|---------------|-----------------|--------------|------------------|---------------------|
| T01-1  | 70.19         | 66.04           | 97.2         | 82.32            | 54.19               |
| T01-2  | 67.68         | 63.76           | 97.34        | 82.4             | 54.41               |
| T01-3  | 70.19         | 65.98           | 97.33        | 82.22            | 54.3                |
| T02-1  | 67.68         | 62.47           | 97.03        | 81.41            | 52.68               |
| T02-2  | 70.19         | 65.15           | 97.22        | 81.67            | 53.08               |
| T02-3  | 70.19         | 65.12           | 97.02        | 81.85            | 52.97               |
| T03-1  | 70.19         | 65.18           | 97.04        | 80.43            | 51.77               |
| T03-2  | 67.69         | 62.77           | 97.06        | 80.3             | 51.45               |
| T03-3  | 70.19         | 64.77           | 97.12        | 80.31            | 51.78               |
| T04-1  | 70.19         | 64.65           | 97.16        | 80.52            | 53.17               |
| T04-2  | 65.7          | 60.64           | 97.14        | 80.89            | 52.73               |
| T04-3  | 67.68         | 62.5            | 97.16        | 80.73            | 52.76               |

Supplementary Table S2. The length distribution of assembled transcripts.

| Sequence Size(nt) | Transcript Number | %      |
|-------------------|-------------------|--------|
| <300              | 2677              | 8.04%  |
| 300-500           | 4399              | 13.20% |
| 500-1000          | 8955              | 26.88% |
| 1000-2000         | 11168             | 33.52% |
| 2000-3000         | 3973              | 11.93% |

|              |       |       |
|--------------|-------|-------|
| 3000+        | 2142  | 6.43% |
| Total number | 33314 |       |

**Supplementary Table S3.** Annotation of genes were searched against TF, PRG, GO, KEGG and Nr databases.

| Database    | Number of Genes | Percentage of All Genes (%) |
|-------------|-----------------|-----------------------------|
| TF          | 1391            | 3.79                        |
| PRG         | 1880            | 5.12                        |
| GO          | 15275           | 41.58                       |
| KEGG        | 26437           | 71.97                       |
| Nr          | 30041           | 81.78                       |
| Annotated   | 32766           | 89.20                       |
| Total genes | 36734           |                             |

**Supplementary Table S4.** Highly and differentially expressed genes involved in starch and sucrose metabolism in *C. henryi* seeds.

| Description | Gene ID   | T01_FPKM | T02_FPKM | T03_FPKM | T04_FPKM |
|-------------|-----------|----------|----------|----------|----------|
| AGPase      | Che003775 | 27.84    | 11.87    | 7.96     | 8.80     |
|             | Che007374 | 600.76   | 490.82   | 433.73   | 364.25   |
|             | Che013145 | 305.95   | 180.45   | 120.53   | 199.51   |
| NPPS        | Che006880 | 26.96    | 15.28    | 19.65    | 17.71    |
|             | Che018517 | 21.03    | 108.91   | 99.69    | 149.35   |
|             | Che032493 | 72.77    | 38.58    | 38.47    | 41.62    |
| SS          | Che013592 | 94.21    | 32.62    | 37.55    | 40.39    |
|             | Che022142 | 156.55   | 66.45    | 61.14    | 61.91    |
|             | Che022683 | 16.90    | 8.96     | 9.72     | 9.68     |
|             | Che035698 | 0.05     | 25.51    | 70.05    | 6.02     |
| GBSS        | Che036389 | 54.81    | 16.93    | 20.21    | 20.58    |
|             | Che000347 | 17.69    | 8.79     | 6.95     | 7.83     |
|             | Che029279 | 3019.21  | 3654.08  | 5289.10  | 4315.59  |
| SBE         | Che001890 | 66.53    | 91.34    | 83.95    | 122.89   |
|             | Che014648 | 26.80    | 10.38    | 9.56     | 7.70     |
|             | Che040552 | 587.73   | 661.23   | 969.03   | 903.45   |
| AMY         | Che011855 | 36.98    | 13.29    | 14.00    | 18.84    |
|             | Che011856 | 52.93    | 48.13    | 80.21    | 143.65   |
|             | Che011857 | 159.28   | 328.26   | 290.06   | 305.64   |
|             | Che034190 | 83.43    | 89.43    | 118.66   | 190.39   |
| BMY         | Che000244 | 21.30    | 6.16     | 6.21     | 4.20     |
|             | Che003213 | 51.51    | 7.66     | 7.02     | 24.88    |
|             | Che009477 | 344.00   | 40.57    | 55.47    | 53.60    |
|             | Che013300 | 8.49     | 30.00    | 76.86    | 66.23    |
|             | Che017448 | 41.50    | 207.88   | 187.52   | 249.53   |
|             | Che021344 | 305.22   | 598.71   | 1055.16  | 955.90   |
| SP          | Che005965 | 63.82    | 34.41    | 45.80    | 45.73    |
|             | Che016246 | 333.05   | 477.33   | 697.74   | 188.40   |
|             | Che025487 | 45.85    | 152.81   | 473.49   | 361.91   |
| ISA         | Che017410 | 5.16     | 12.36    | 15.79    | 18.37    |
|             | Che019232 | 116.20   | 50.72    | 87.77    | 56.64    |
| MAL         | Che005471 | 17.46    | 94.82    | 75.40    | 90.31    |
|             | Che005472 | 11.57    | 44.89    | 49.32    | 51.15    |
|             | Che010778 | 63.44    | 48.74    | 40.78    | 29.08    |

|        |           |        |        |        |        |
|--------|-----------|--------|--------|--------|--------|
|        | Che015252 | 12.24  | 68.84  | 73.75  | 31.98  |
|        | Che015253 | 10.93  | 67.92  | 67.68  | 25.83  |
| UGPase | Che002934 | 201.94 | 233.93 | 232.26 | 173.75 |
|        | Che009576 | 6.82   | 1.39   | 0.67   | 1.02   |
|        | Che032936 | 13.83  | 3.14   | 3.02   | 1.47   |
| SuSy   | Che028628 | 0.02   | 67.47  | 3.75   | 53.09  |
|        | Che028629 | 80.98  | 672.63 | 279.23 | 213.89 |
| SPS    | Che002155 | 25.65  | 14.82  | 15.47  | 7.97   |
| SPP    | Che022264 | 125.89 | 34.14  | 45.56  | 42.48  |
| INV    | Che001882 | 0.66   | 8.84   | 5.64   | 6.28   |
|        | Che009013 | 1.85   | 44.53  | 36.12  | 32.23  |
|        | Che019953 | 12.43  | 18.89  | 11.37  | 6.20   |
|        | Che025004 | 14.49  | 4.48   | 2.84   | 3.43   |
|        | Che036493 | 37.58  | 38.72  | 47.75  | 46.25  |
|        | Che036502 | 7.57   | 0.63   | 0.20   | 0.65   |

**Supplementary Table S5.** Primers used in this study.

| Gene ID   | Description | Sequence (5' - 3')                               | Primer Length/bp | Product Length/bp |
|-----------|-------------|--------------------------------------------------|------------------|-------------------|
| Che006880 | NPPS        | AGTCAGAAGGAGGTTGTGGAA<br>CATTACAGGTAGGCAGTGAAGT  | 21<br>22         | 232               |
| Che032493 | NPPS        | CAACTGAACCACGCAACTGAG<br>TCTTCCAACCTTCTGCCATACCA | 21<br>22         | 224               |
| Che003775 | AGPase      | AGCAGATGCAGTGAGGCAATTC<br>AATCTGATGCACGGCTGTTACC | 22<br>22         | 191               |
| Che013145 | AGPase      | GCCAAAGAGACCCTGACCATAC<br>GAACCACTTCATTCTGCTTCC  | 22<br>22         | 261               |
| Che013592 | SS          | CCTCTGATGTTGACTCCACCAA<br>TTGCTTCACCATCCACCTCTG  | 22<br>21         | 168               |
| Che022683 | SS          | TTCGCCTCCAAACCCAACCT<br>ACTCCTCCACTGCCACAAGAC    | 20<br>21         | 263               |
| Che036389 | SS          | TCTCTACTCTCGCCTCAGAACC<br>ATGGAGTCAACACAGACCTTCG | 22<br>22         | 219               |
| Che034253 | RP-L34e     | GCTACGCCACCAAATCCAATC<br>CTCTTGCCAGTTACAGGACACT  | 21<br>22         | 115               |
